# Supplementary material for: Beyond the Hypercube: Evolutionary Accessibility of Fitness Landscapes with Realistic Mutational Networks
Source: PubMed Central journal article supplement (PMC5147777; doi:10.1371/journal.pcbi.1005218), 2016-12-09
Supplement: pcbi.1005218.s008.pdf [file pcbi.1005218.s008.pdf]

**10k sub-FLs generated from DNA-protein binding affinities (Rowe et al.)**

|                                                    | $K=4, L=5$           |                   | $K=2, L=10$       |            |
|----------------------------------------------------|----------------------|-------------------|-------------------|------------|
|                                                    | Experimental         | Randomized        | Experimental      | Randomized |
| accessibility $A$                                  | 0.86                 | 0.51              | 0.67              | 0.13       |
| $\langle$ coverage of FL $\rangle^*$               | 28%                  | 8%                | 26%               | 3%         |
| $\langle$ pathway length $\rangle$                 | 16.8                 | 10.0              | 15.4              | 11.1       |
| $\langle$ forward mutations $\rangle$              | 43%                  | 57%               | 82%               | 95%        |
| $\langle$ distance – neutral mutations $\rangle$   | 44%                  | 37%               | 0%                | 0%         |
| $\langle$ backward mutations $\rangle$             | 13%                  | 7%                | 18%               | 5%         |
| $\langle$ pathway number $\rangle$                 | $1.2 \times 10^{10}$ | $1.9 \times 10^3$ | $2.3 \times 10^6$ | 19         |
| $\langle \log_{10}(\text{pathway number}) \rangle$ | 5.4                  | 2.1               | 3.9               | 0.8        |

**1k sub-FLs generated from RNA-protein binding affinities (Guenther et al.)**

|                                                    | $K=4, L=3$        |            | $K=2, L=6$   |            |
|----------------------------------------------------|-------------------|------------|--------------|------------|
|                                                    | Experimental      | Randomized | Experimental | Randomized |
| accessibility $A$                                  | 0.95              | 0.59       | 0.78         | 0.20       |
| $\langle$ coverage of FL $\rangle$                 | 42%               | 24%        | 44%          | 19%        |
| $\langle$ pathway length $\rangle$                 | 6.7               | 5.3        | 7.1          | 6.4        |
| $\langle$ forward mutations $\rangle$              | 52%               | 61%        | 92%          | 97%        |
| $\langle$ distance – neutral mutations $\rangle$   | 41%               | 35%        | 0%           | 0%         |
| $\langle$ backward mutations $\rangle$             | 7%                | 4%         | 8%           | 3%         |
| $\langle$ pathway number $\rangle$                 | $1.8 \times 10^3$ | 58         | 131          | 6.1        |
| $\langle \log_{10}(\text{pathway number}) \rangle$ | 2.2               | 1.2        | 1.6          | 0.6        |

\*) The average  $\langle \dots \rangle$  was restricted to accessible FLs: for each such FL we first calculated the corresponding quantity, and then averaged it over all accessible FLs. Statistical errors (s.e.m.) are at most +/-1 of the last digit.
